# Supplementary material
Source: publisher figshare collection journal article supplement (https://asha.figshare.com/articles/dataset/_/14109881)
Supplement: Supplementary file 2 [file 1]

**Supplemental Material S1. Ethical approval.\***

| Country | Ethical board                                                                                                                |
|---------|------------------------------------------------------------------------------------------------------------------------------|
| England | NHS ethics - REC Reference 18/LO/1339, IRAS 250519                                                                           |
| Hungary | Human Research Ethics Board at Apáczai Csere János Faculty, Széchenyi István University (Győr, Hungary), SZE-AK-2018/001     |
| Israel  | Faculty of Social Welfare & Health Sciences #403/18 The University of Haifa, Israel                                          |
| Spain   | The study was approved by the Andalusian Biomedical Research Committee (regional health administration)                      |
| Ireland | Ethical approval for the study from the Health Services Executive Research Ethics Committee in Merlin Park, Galway, Ireland. |

\*Researchers from the five remaining countries approached their National Ethics Committees, or their local universities and were informed that they did not require ethical approval for qualitative studies.
