# Supplementary material
Source: publisher figshare collection journal article supplement (https://asha.figshare.com/articles/dataset/_/14109881)
Supplement: Supplementary file 3 [file 1]

**Supplemental Material S2.** Interview details.

| <i>Country</i>     | <i>Length interview in<br/>minutes</i> | <i>Location</i>                                         | <i>Were field notes<br/>taken?</i> |
|--------------------|----------------------------------------|---------------------------------------------------------|------------------------------------|
| <i>Croatia</i>     | <i>55</i>                              | <i>Participants' home</i>                               | <i>yes</i>                         |
| <i>Denmark</i>     | <i>73</i>                              | <i>University clinic</i>                                | <i>no</i>                          |
| <i>England</i>     | <i>51</i>                              | <i>Participants' home</i>                               | <i>yes</i>                         |
| <i>Hungary</i>     | <i>53</i>                              | <i>Participants' home</i>                               | <i>yes</i>                         |
| <i>Iceland</i>     | <i>60</i>                              | <i>Centre for Language Development<br/>and Literacy</i> | <i>yes</i>                         |
| <i>Ireland</i>     | <i>44</i>                              | <i>University</i>                                       | <i>yes</i>                         |
| <i>Israel</i>      | <i>77</i>                              | <i>University clinic</i>                                | <i>no</i>                          |
| <i>Netherlands</i> | <i>45</i>                              | <i>Participants' home</i>                               | <i>yes</i>                         |
| <i>Norway</i>      | <i>50</i>                              | <i>Participants' home</i>                               | <i>no</i>                          |
| <i>Spain</i>       | <i>35</i>                              | <i>Participants' home</i>                               | <i>no</i>                          |
